# Supplementary material for: Seascape connectivity of European anchovy in the Central Mediterranean Sea revealed by weighted Lagrangian backtracking and bio-energetic modelling
Source: PubMed Central journal article supplement (PMC7596485; doi:10.1038/s41598-020-75680-8), 2020-10-29
Supplement: 41598_2020_75680_MOESM1_ESM.pdf [file 41598_2020_75680_MOESM1_ESM.pdf]

**Supplementary information**  
*for*  
**Seascape connectivity of European anchovy in the Central  
Mediterranean Sea revealed by weighted Lagrangian backtracking  
and bio-energetic modelling**

Federico Falcini\*<sup>1</sup>, Raffaele Corrado<sup>1</sup>, Marco Torri<sup>2</sup>, Maria Cristina Mangano<sup>3,4</sup>, Rafik Zarrad<sup>5</sup>,  
Antonio Di Cintio<sup>1</sup>, Luigi Palatella<sup>6</sup>, Othman Jarbou<sup>7</sup>, Hechmi Missaoui<sup>8</sup>, Angela Cuttitta<sup>9</sup>, Bernardo  
Patti<sup>10</sup>, Rosalia Santoleri<sup>1</sup>, Gianluca Sarà<sup>3</sup>, Guglielmo Lacorata<sup>1,11</sup>

<sup>1</sup>*Istituto di Scienze Marine, Consiglio Nazionale delle Ricerche, UOS Roma, 00133 Rome, Italy*

<sup>2</sup>*Istituto per lo studio degli impatti Antropici e Sostenibilità in ambiente marino, Consiglio Nazionale delle Ricerche, SS Capo Granitola, 91021 Campobello di Mazara (TP), Italy*

<sup>3</sup>*Dipartimento di Scienze della Terra e del Mare, DiSTeM, Università degli Studi di Palermo, Edificio 16, 90128 Palermo, Italy*

<sup>4</sup>*Stazione zoologica Anton Dohrn, Dipartimento Ecologia Marina Integrata, Sede Interdipartimentale della Sicilia, Lungomare Cristoforo Colombo (complesso Roosevelt), 90142 Palermo, Italy*

<sup>5</sup>*Institut National des Sciences et Technologies de la Mer, BP. 138, 5199 Mahdia, Tunisia*

<sup>6</sup>*Liceo Scientifico Statale "C. De Giorgi", I-73100 Lecce, Italy*

<sup>7</sup>*Institut National des Sciences et Technologies de la Mer, BP 1035, 3018 Sfax, Tunisia*

<sup>8</sup>*Institut National des Sciences et Technologies de la Mer, 2025 Salambô, Tunisia*

<sup>9</sup>*Istituto di Studi sul Mediterraneo, Consiglio Nazionale delle Ricerche, SS Palermo, 90145 Palermo, Italy*

<sup>10</sup>*Istituto per lo studio degli impatti Antropici e Sostenibilità in ambiente marino, Consiglio Nazionale delle Ricerche, SS Palermo, 90149 Palermo (PA), Italy*

<sup>11</sup>*Center of Excellence for Telesensing of Environment and Model Prediction of Severe events (CETEMPS), Università dell'Aquila, L'Aquila, Italy*

\*Corresponding author: federico.falcini@cnr.it

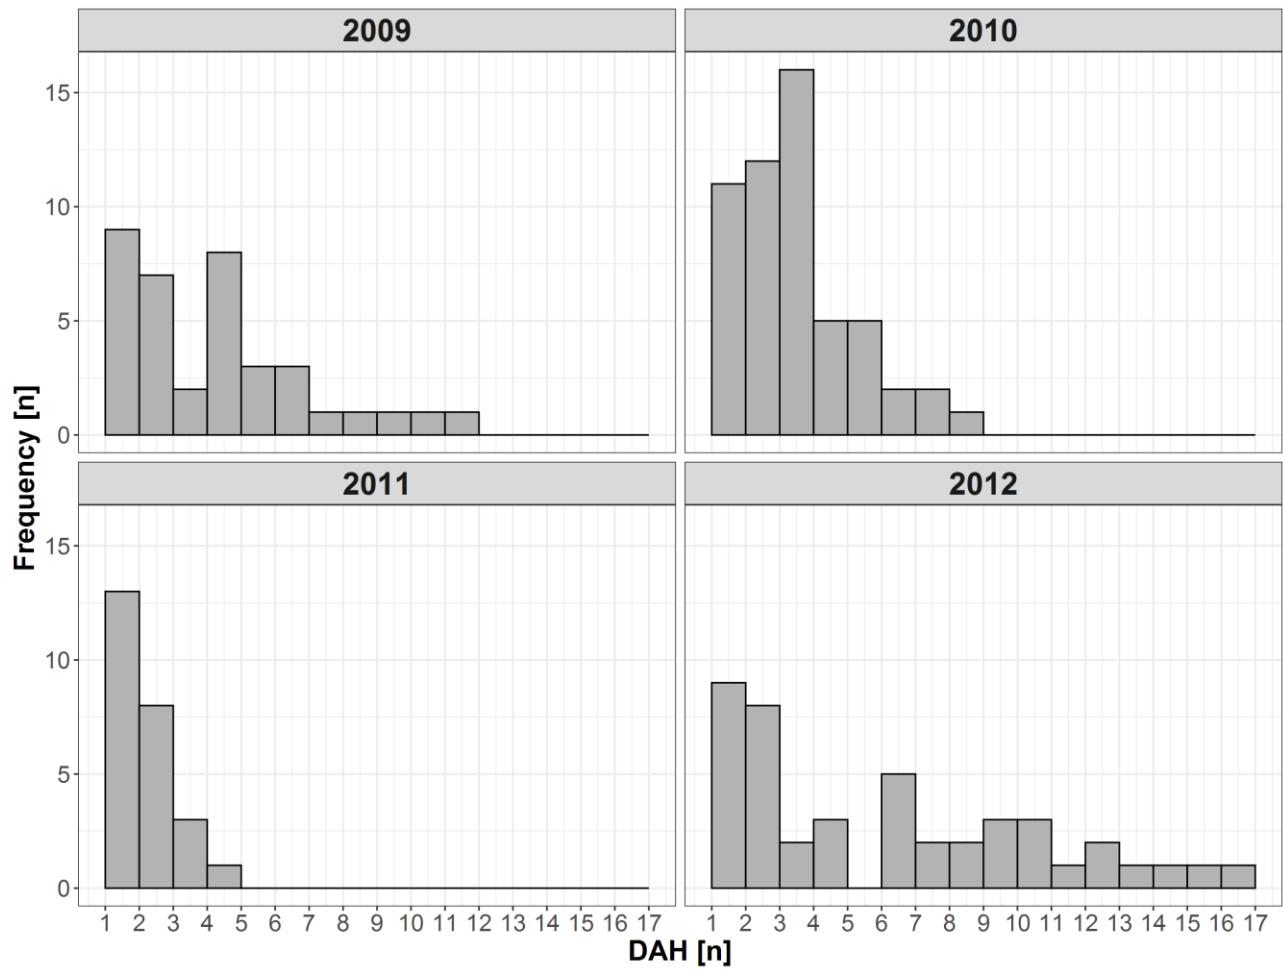

**Fig. S1** – Age (days after hatching, DAH) frequency distribution estimated from the otolith analysis of European anchovy larvae collected in four surveys conducted in the Strait of Sicily (GSA16 and GSA15).

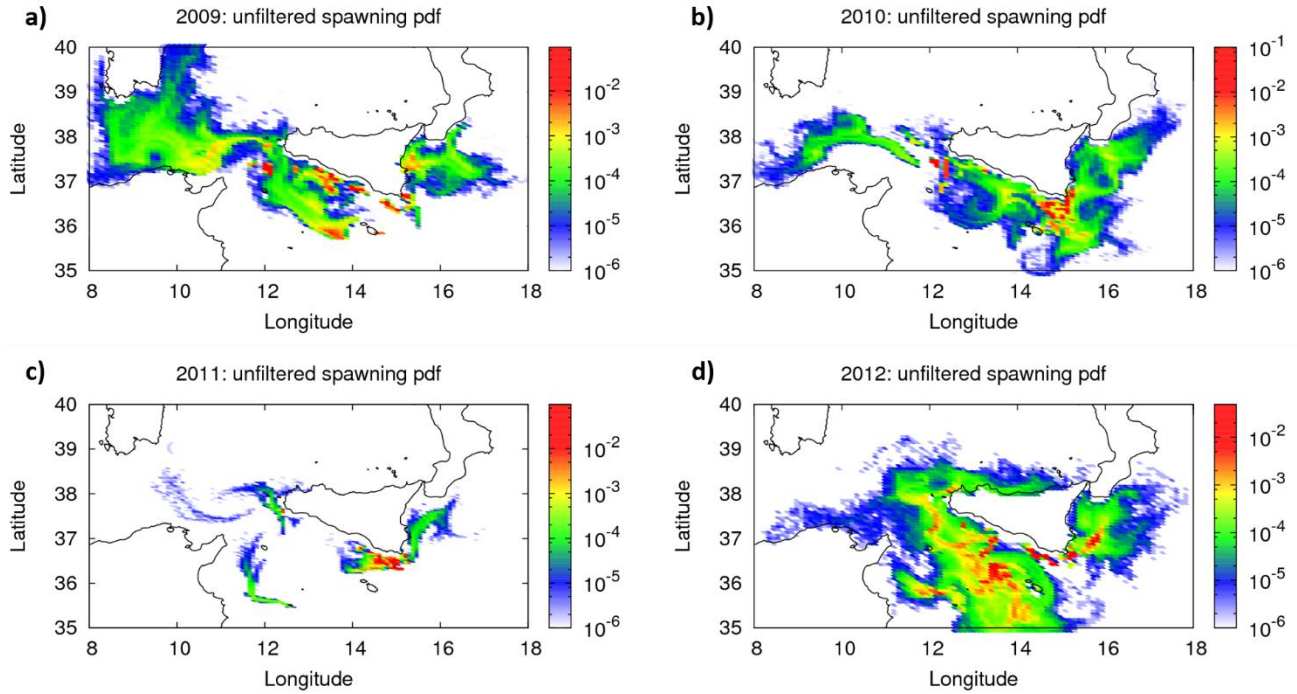

**Fig. S2** – Probability distribution function (pdf) of spawning areas, as reconstructed from back-trajectories of anchovy larvae (no chlorophyll-weighted filter is applied), collected within the GSA16, in the year 2009 (a), 2010 (b), 2011 (c), and 2012 (d). Numerical back-trajectories were initialized from in-situ eggs and larvae concentration and age data (see text). Maps were generated using GIMP 2.8 (<http://gimp.org>).
